# Supplementary material for: Prostaglandin receptor EP3 regulates cell proliferation and migration with impact on survival of endometrial cancer patients
Source: PubMed Central journal article supplement (PMC5787529; doi:10.18632/oncotarget.23140), 2017-12-09
Supplement: oncotarget-09-982-s001.pdf [file oncotarget-09-982-s001.pdf]

## Prostaglandin receptor EP3 regulates cell proliferation and migration with impact on survival of endometrial cancer patients

### SUPPLEMENTARY MATERIALS

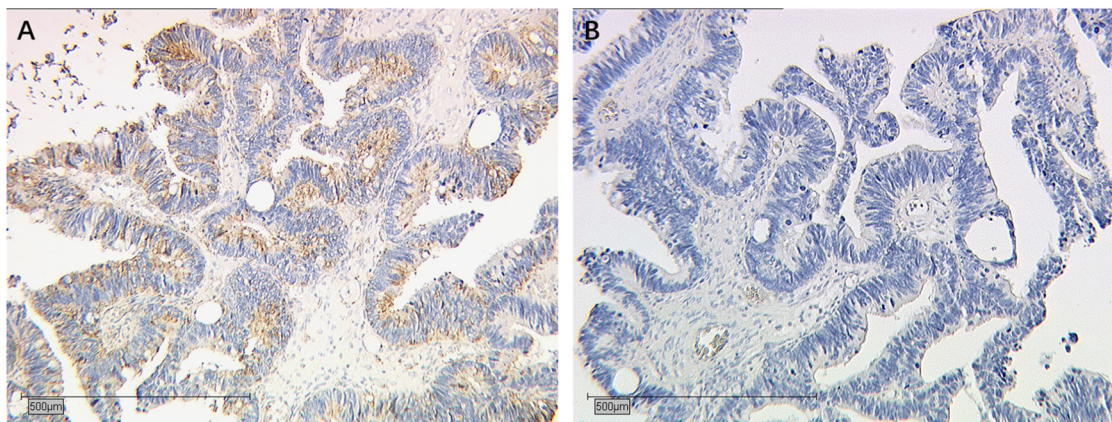

**Supplementary Figure 1: Representative microphotographs of positive and negative controls for EP3 in normal colon tissue. (A)** Positive control of EP3 staining in normal colon tissue showed strong cytoplasm expression in more than 80% epithelial cells. **(B)** Negative control of EP3 staining in same normal colon tissue as positive control. Scale bars equal 500 µm.

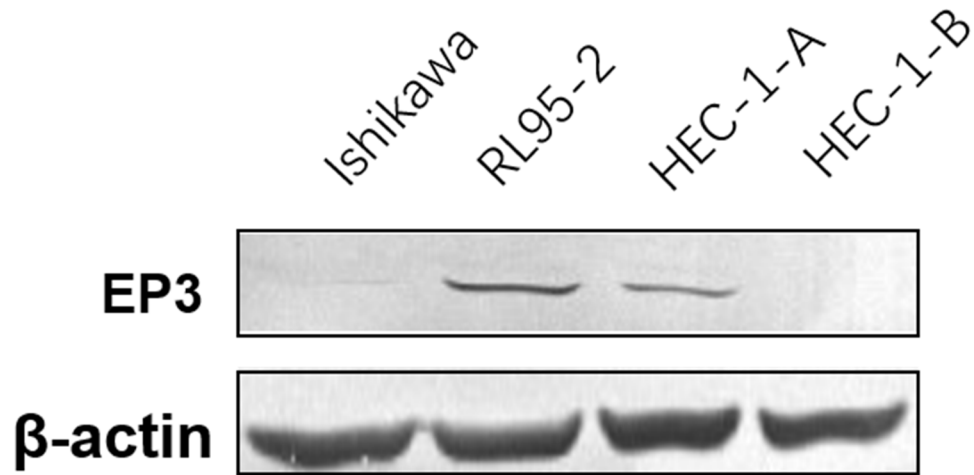

Supplementary Figure 2: EP3 protein expression in various EC cells. For gel source data, see Supplementary Figure 4.

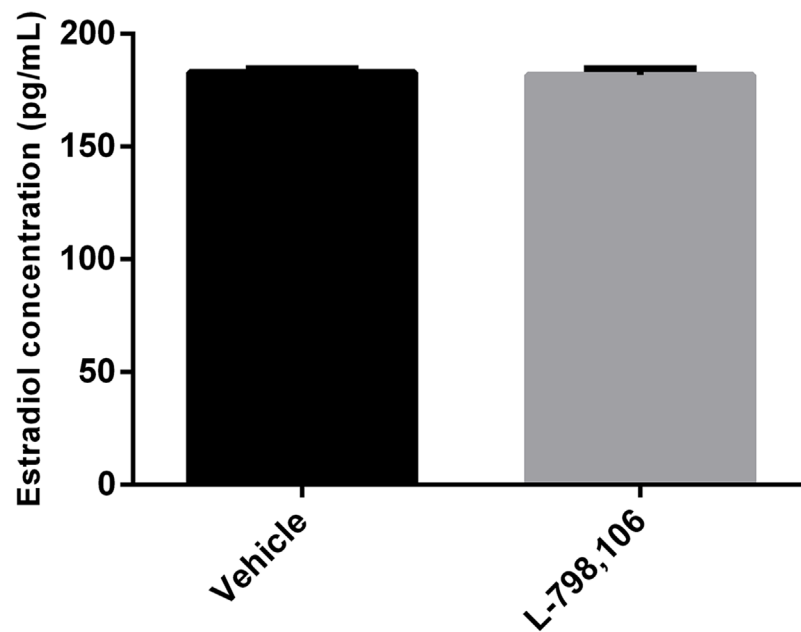

**Supplementary Figure 3: EP3 does not change the formation of estradiol.** RL95-2 cells incubated with vehicle (0.1% (v/v) DMSO) or 1  $\mu$ M L-798,106 for 24 h. Levels of estradiol in the supernatant were estimated by chemi-luminescent immunometric assay. Bar graph represents mean  $\pm$  SEM (n = 4).

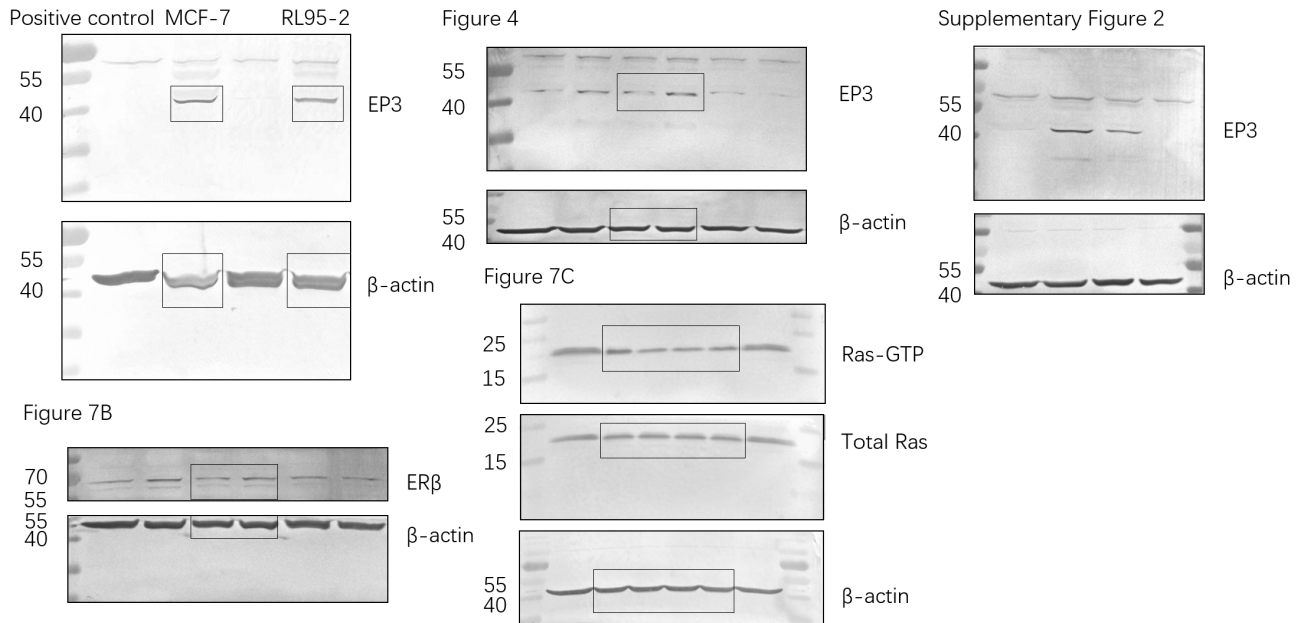

Supplementary Figure 4: Uncropped scans with marker indications.
